# Supplementary material
Source: Springer Nature journal article supplement (https://www.springermedizin.de/resource/supplementary/13054_2011_9890_MOESM3_ESM.pdf/9707080)
Supplement: MOESM3 [file 9707080]

n = 368

Traumatic Pre-Hospital Cardiac Arrest  
**100 %**

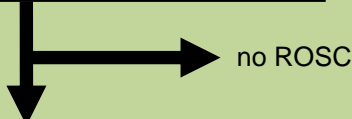

n = 107

Return of spontaneous circulation (ROSC)  
**29 %**

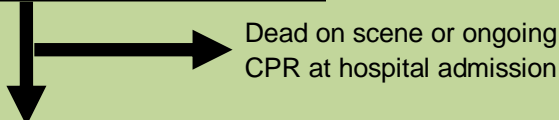

n = 95

Hospital admission after ROSC  
**26 %**

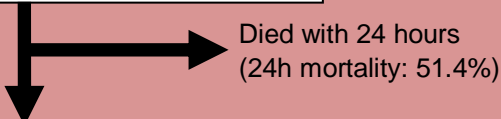

n = 814

24h Survival  
**13 %**

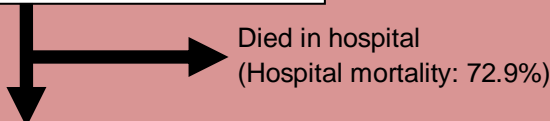

n = 396

Discharged alive  
**7 %**

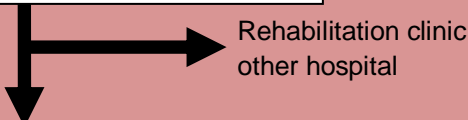

n = 221

Discharged home  
**2 %**

n = 56
